# Supplementary material
Source: publisher figshare collection journal article supplement (https://acs.figshare.com/ndownloader/files/5781975)

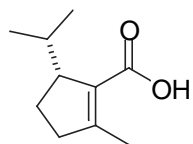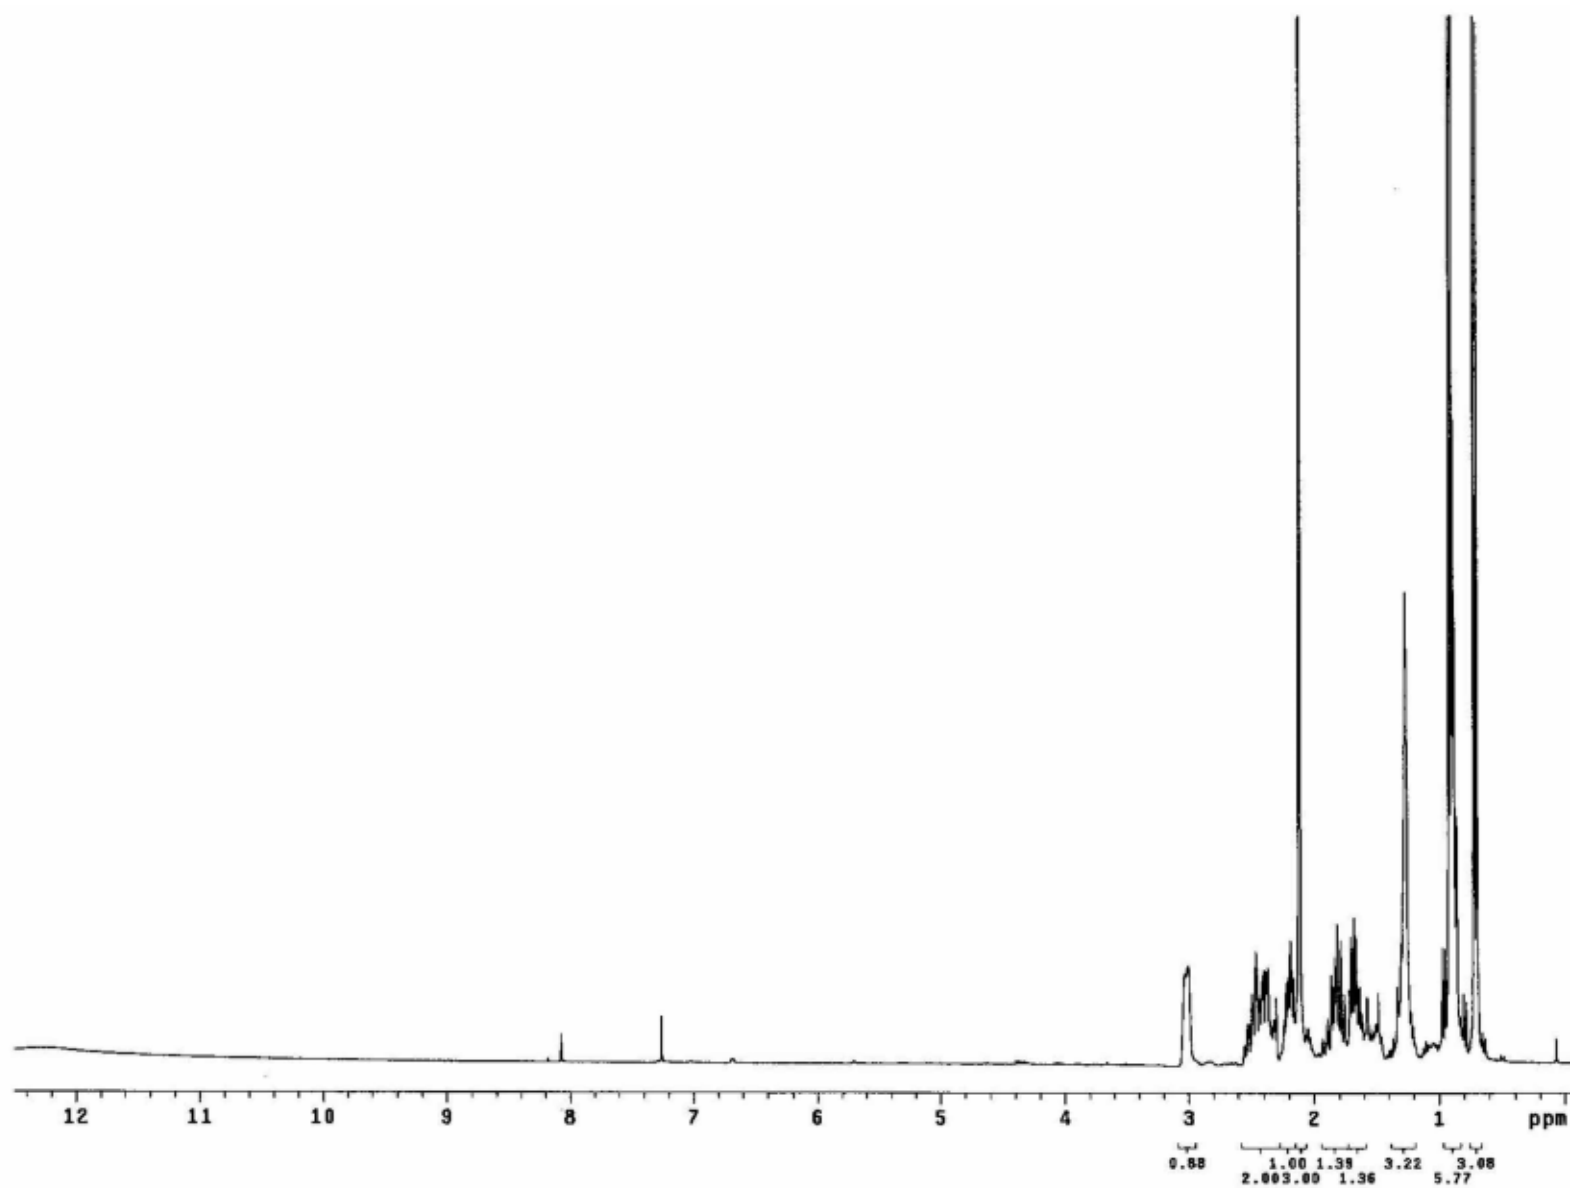

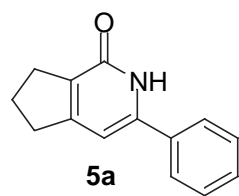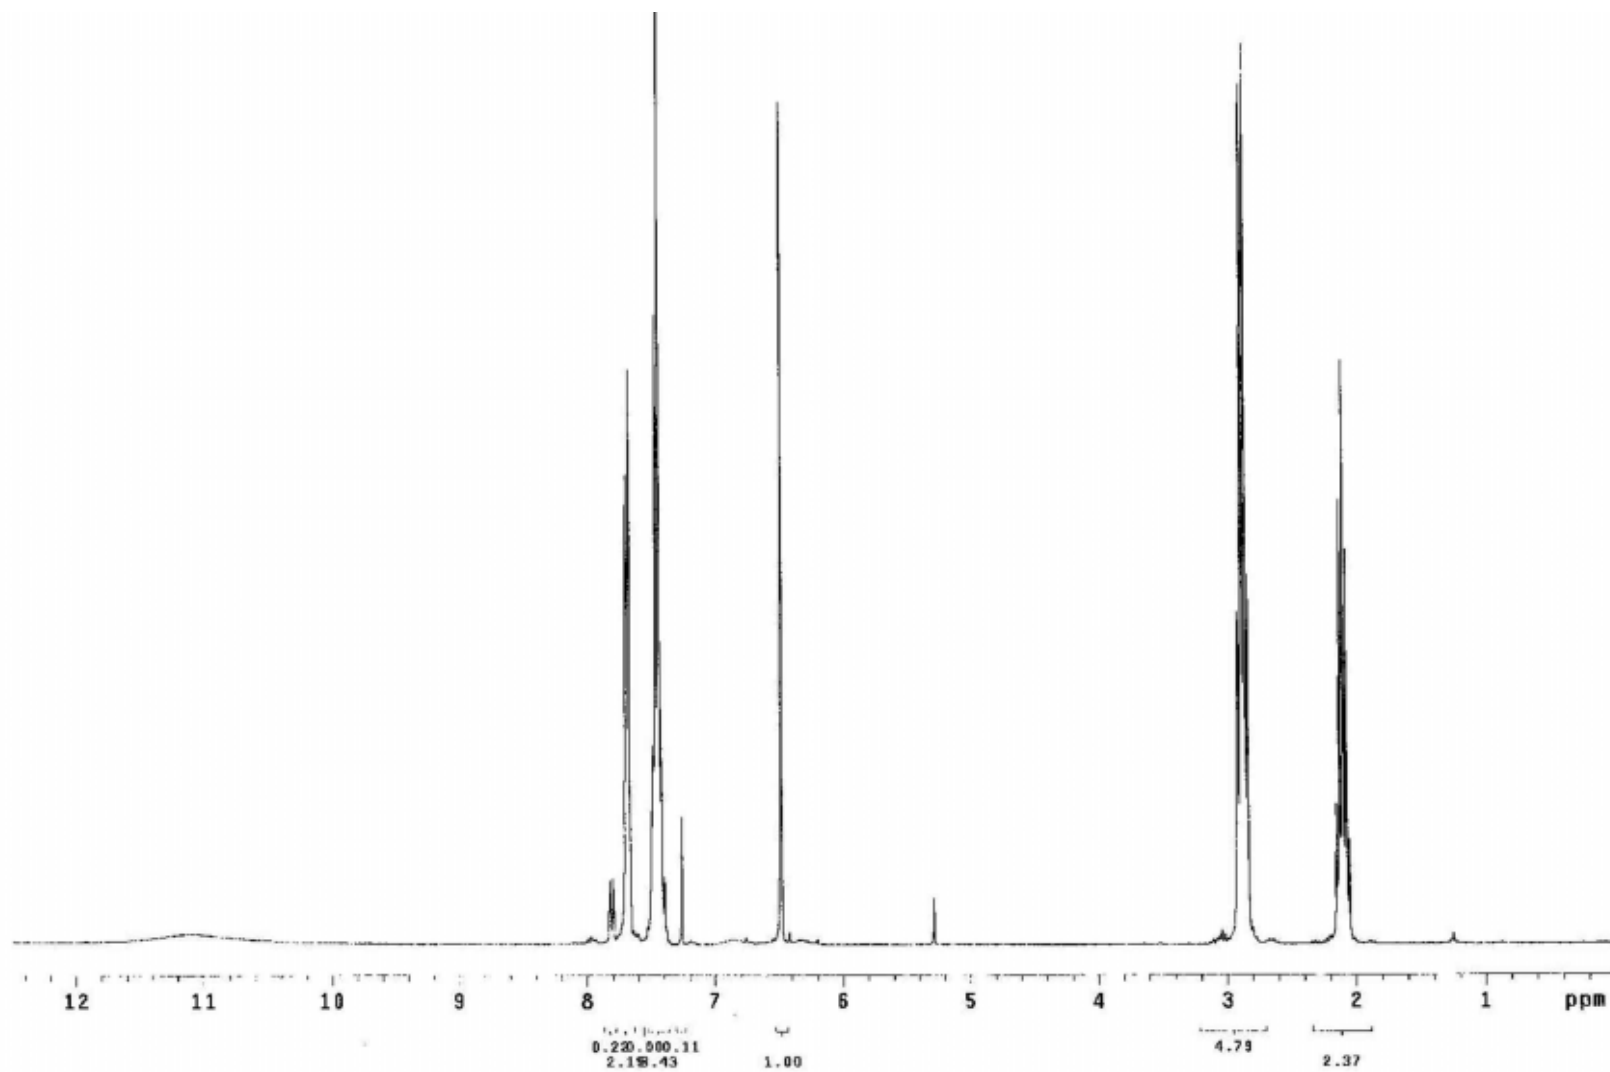

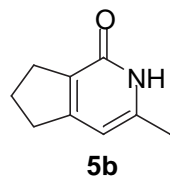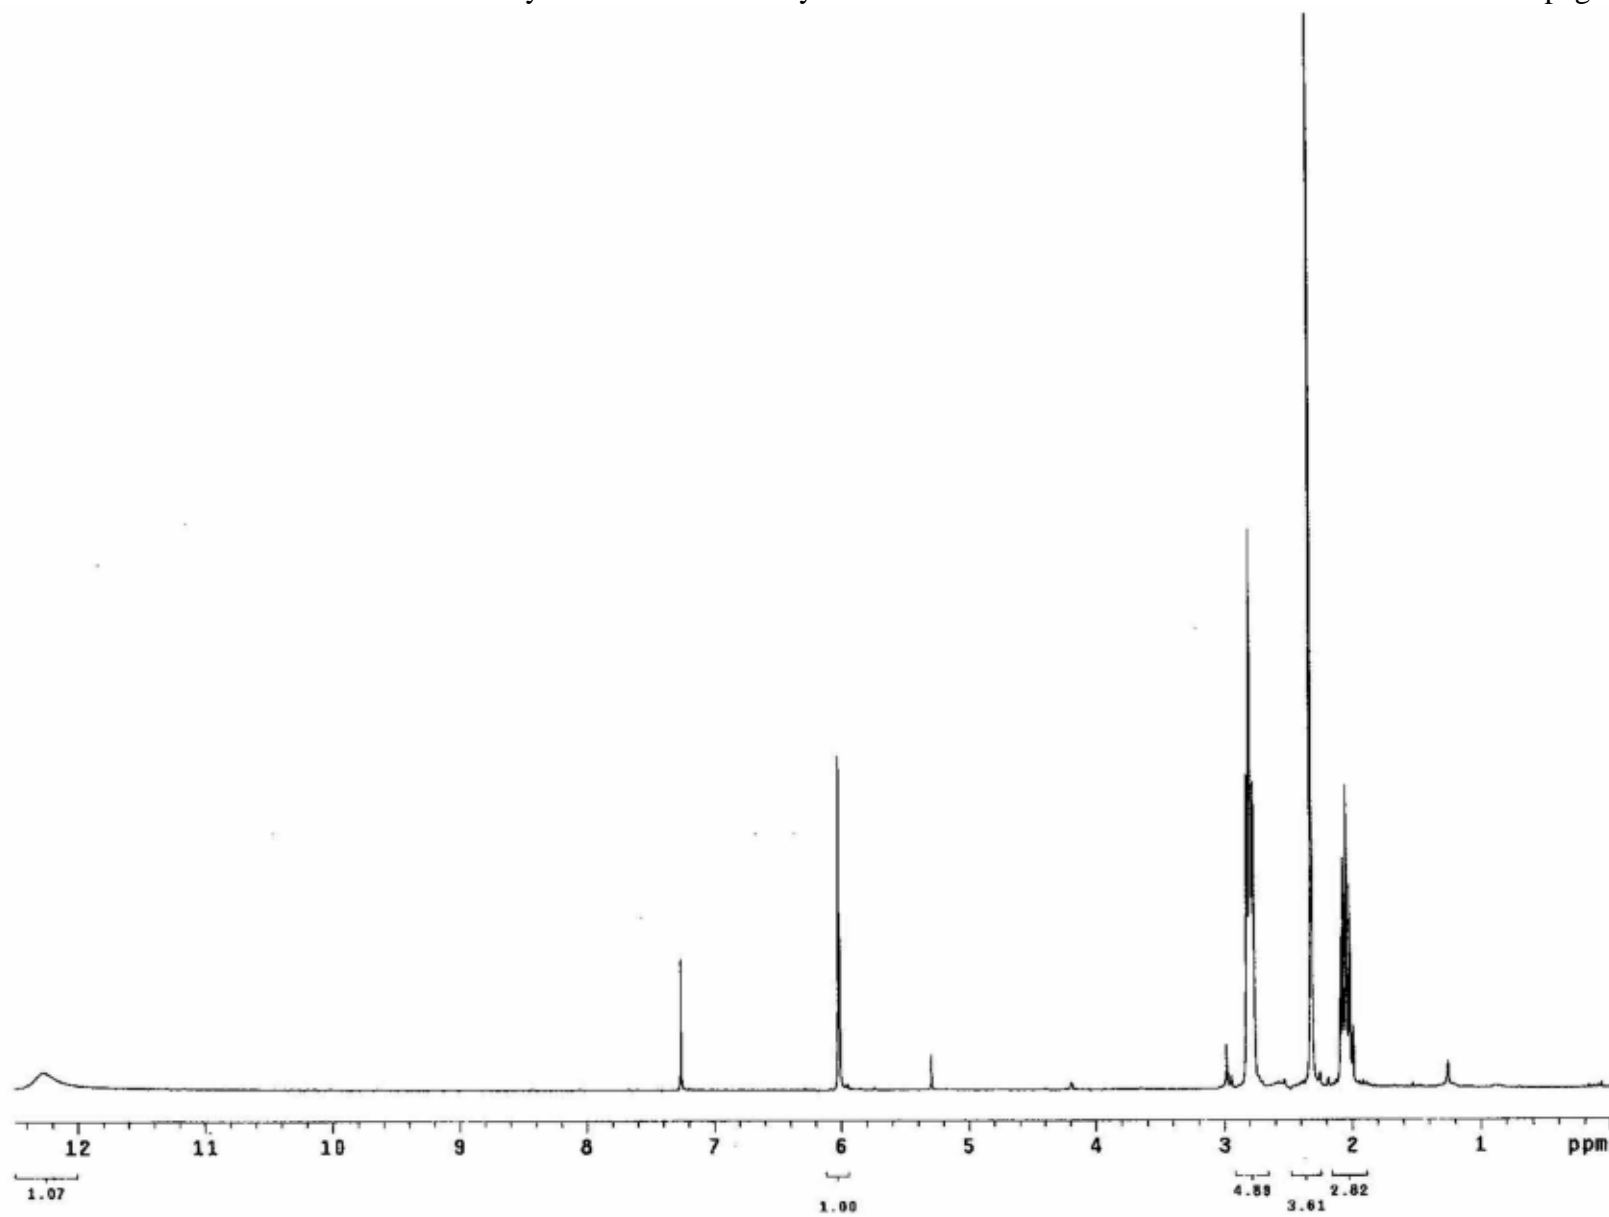

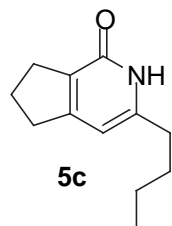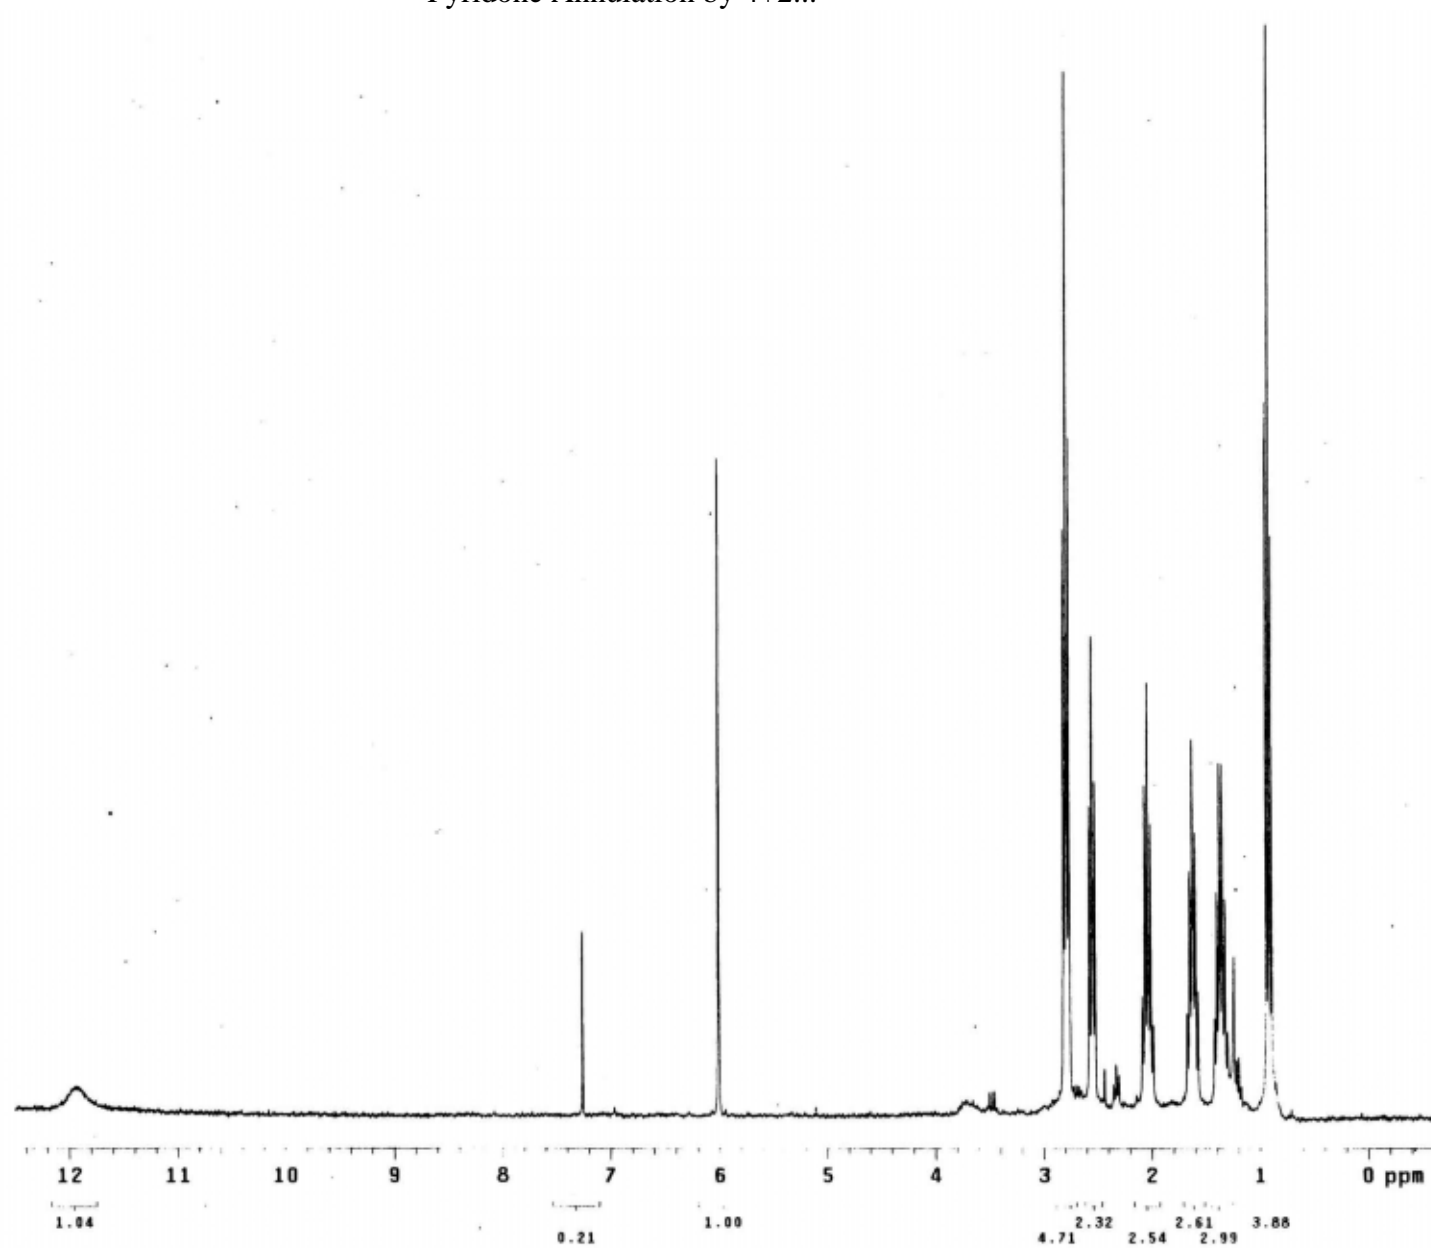

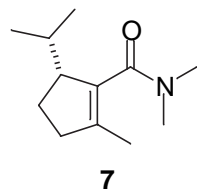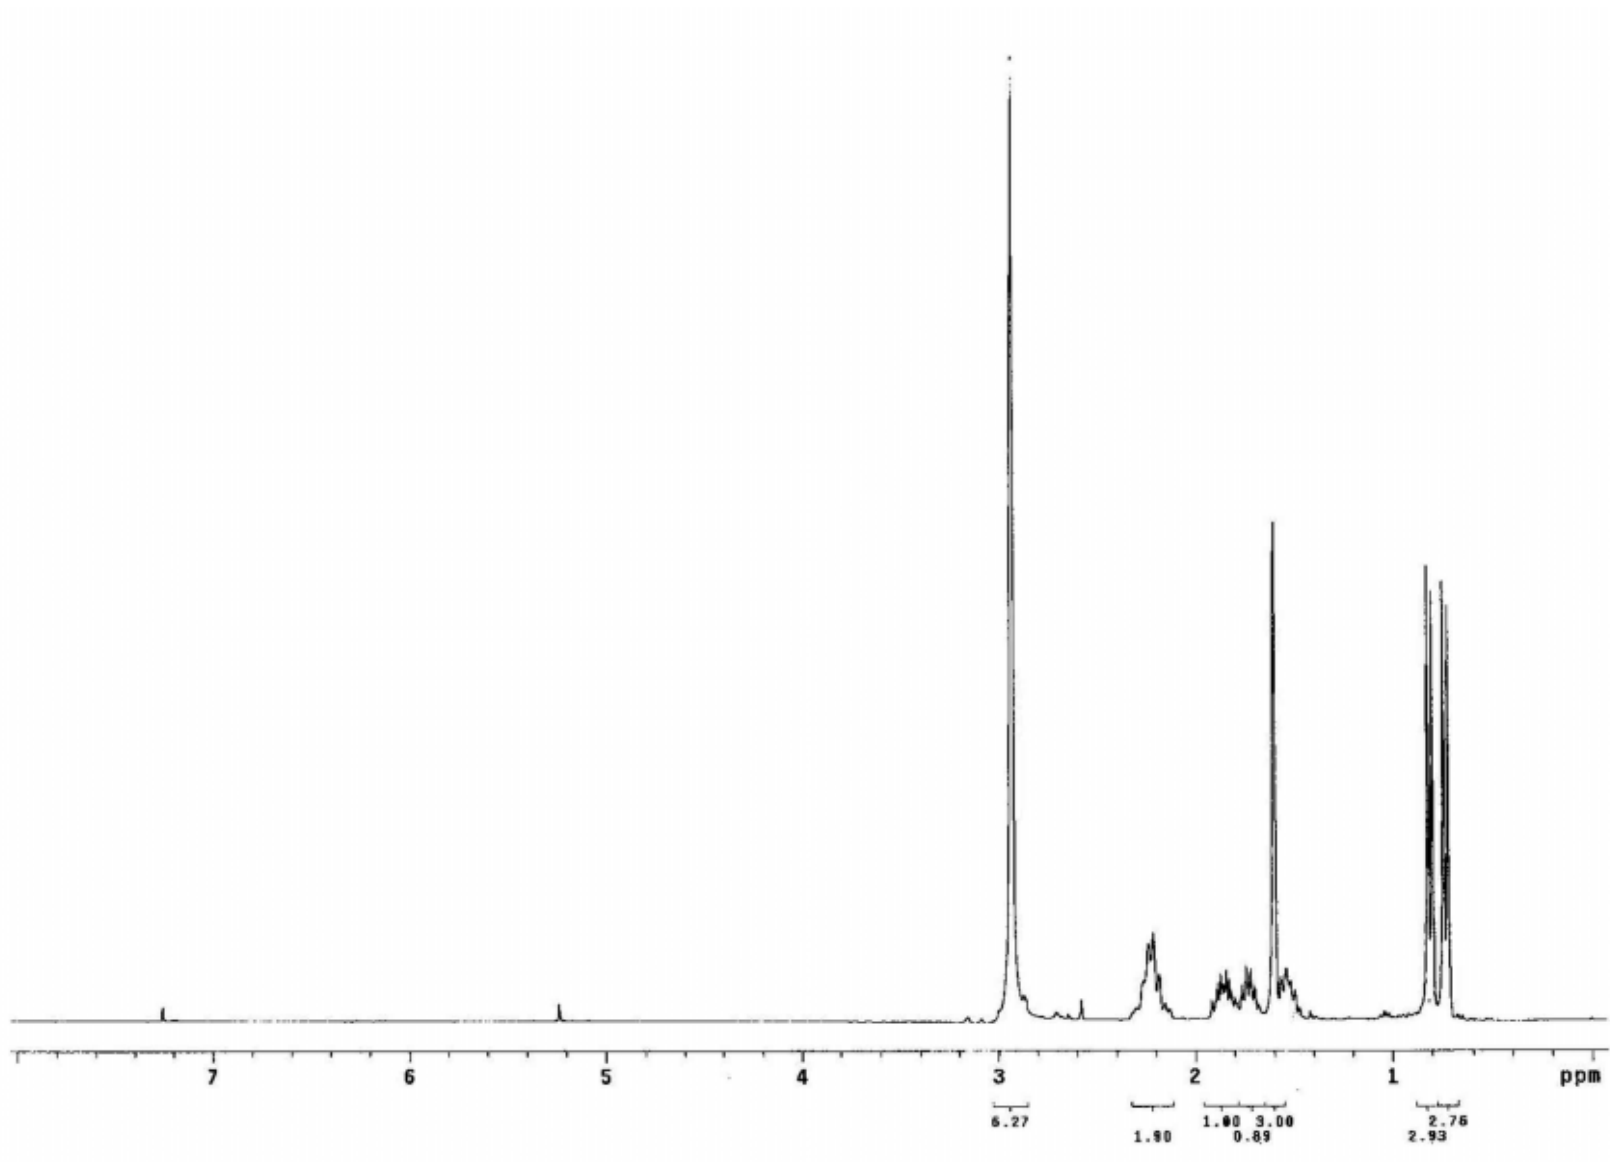

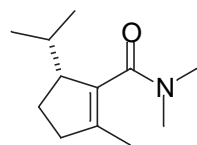

**7**  
**COSY**

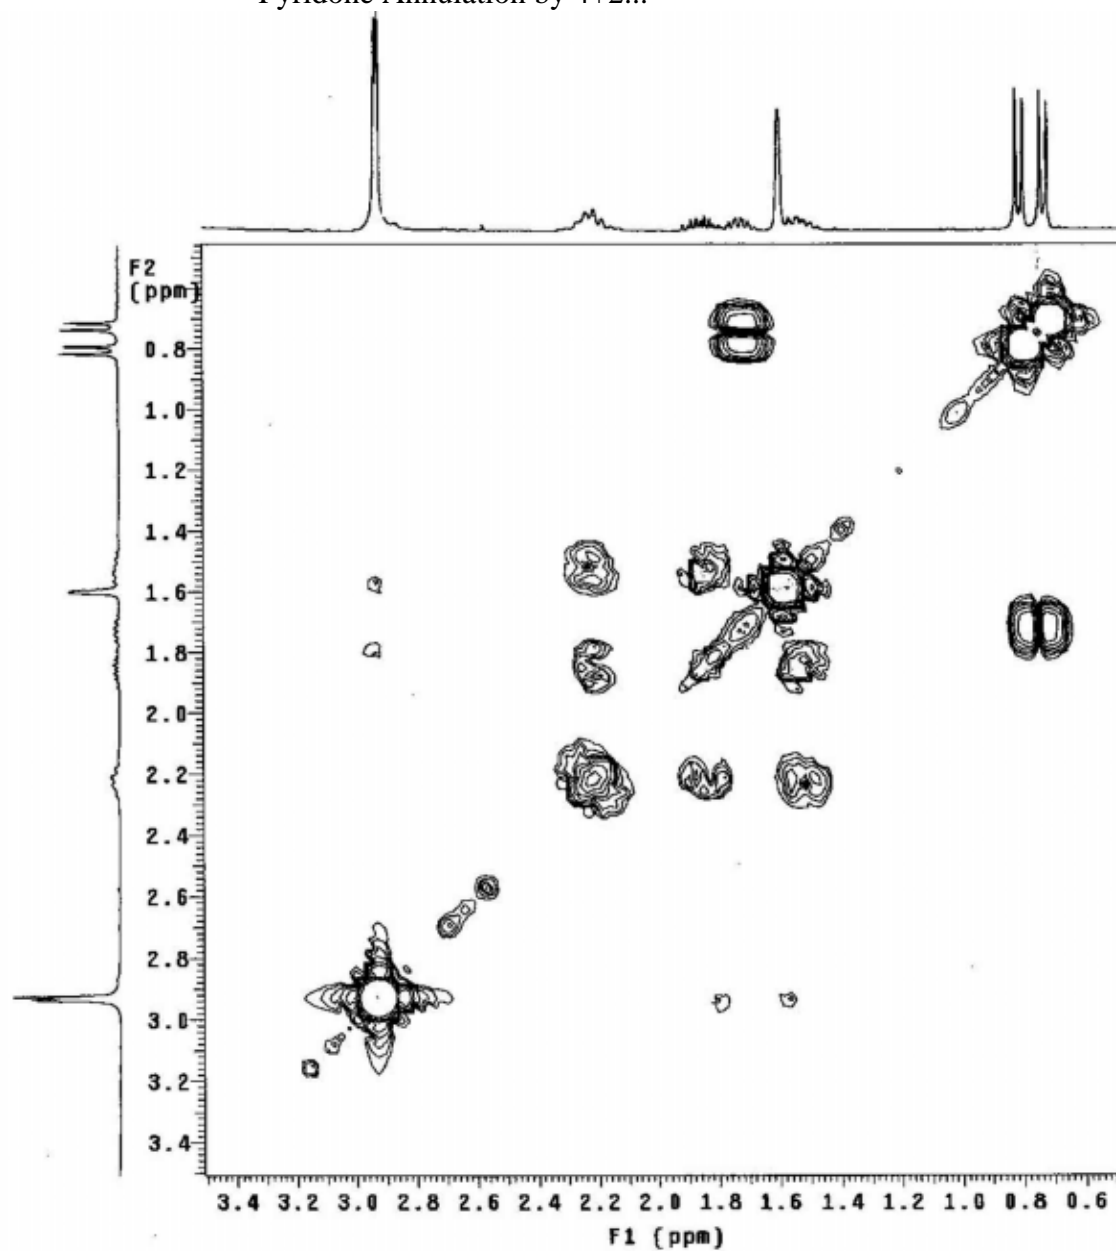

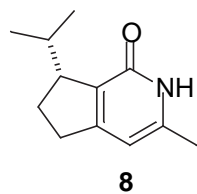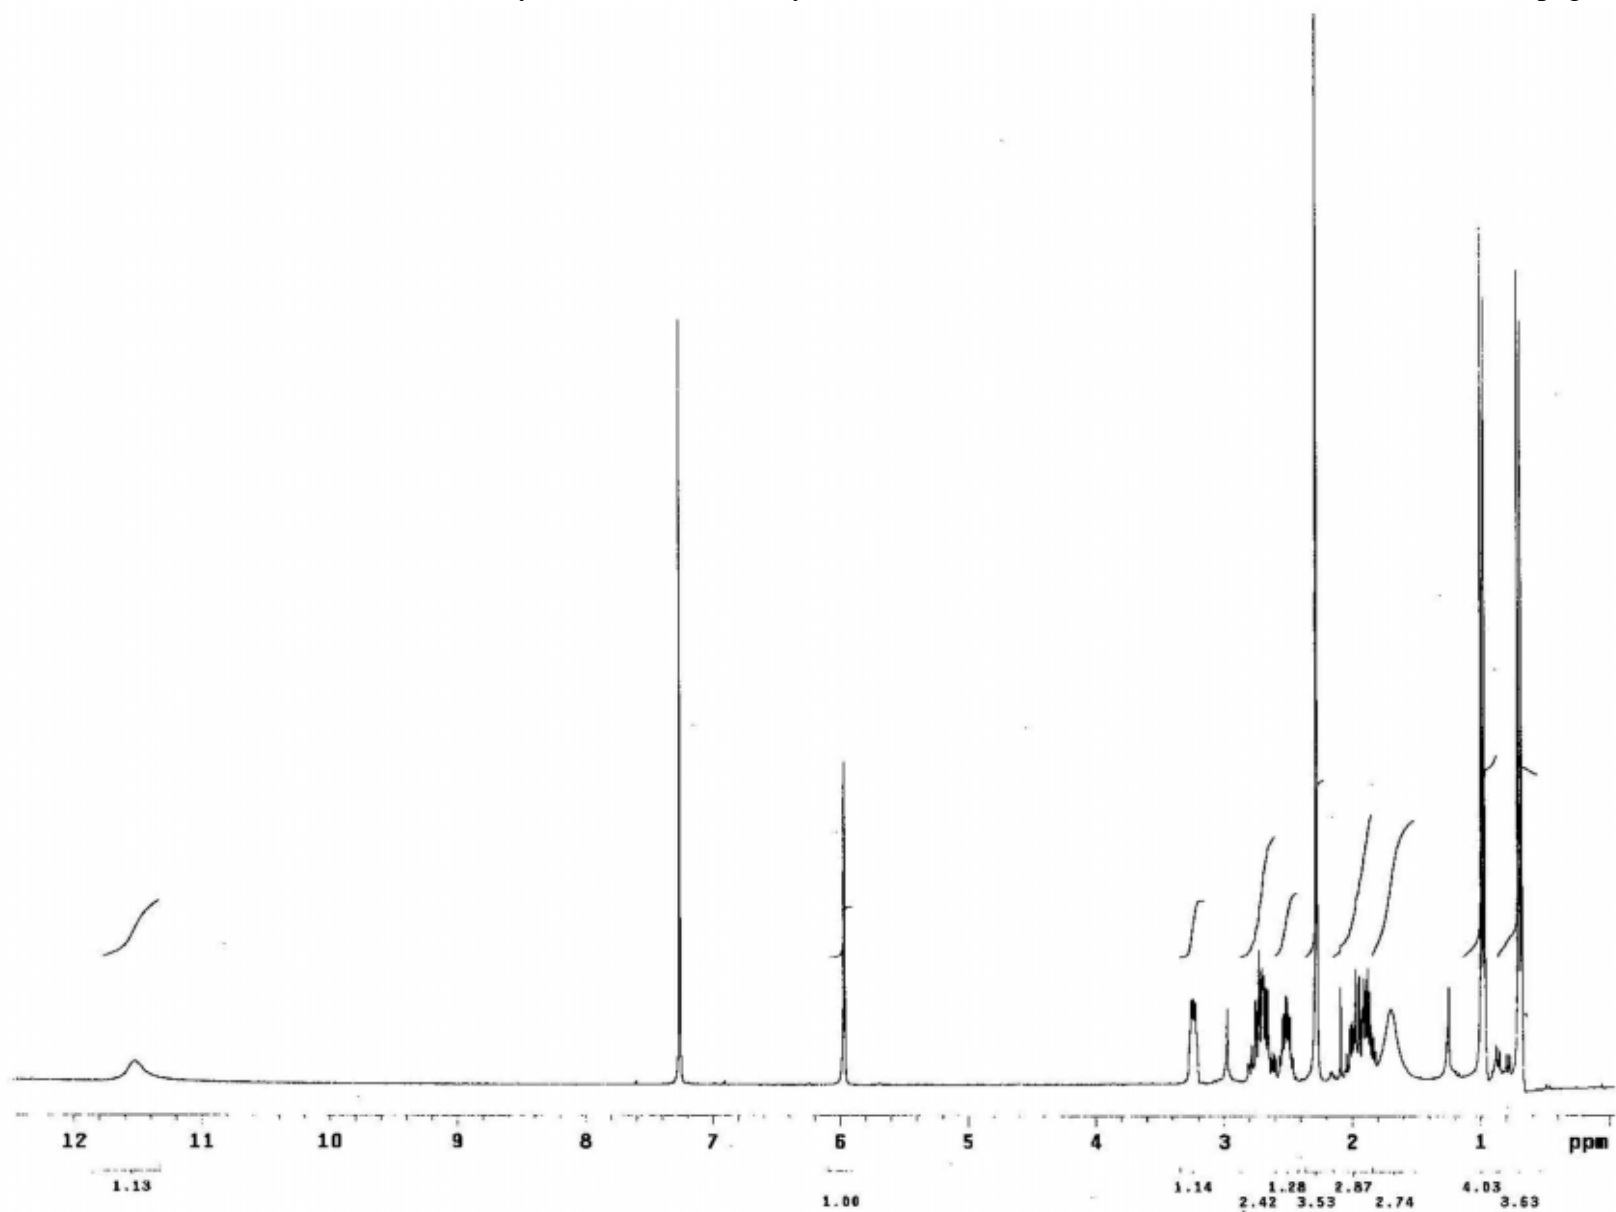

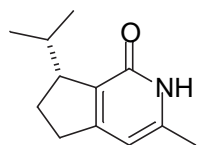**8**  
**COSY**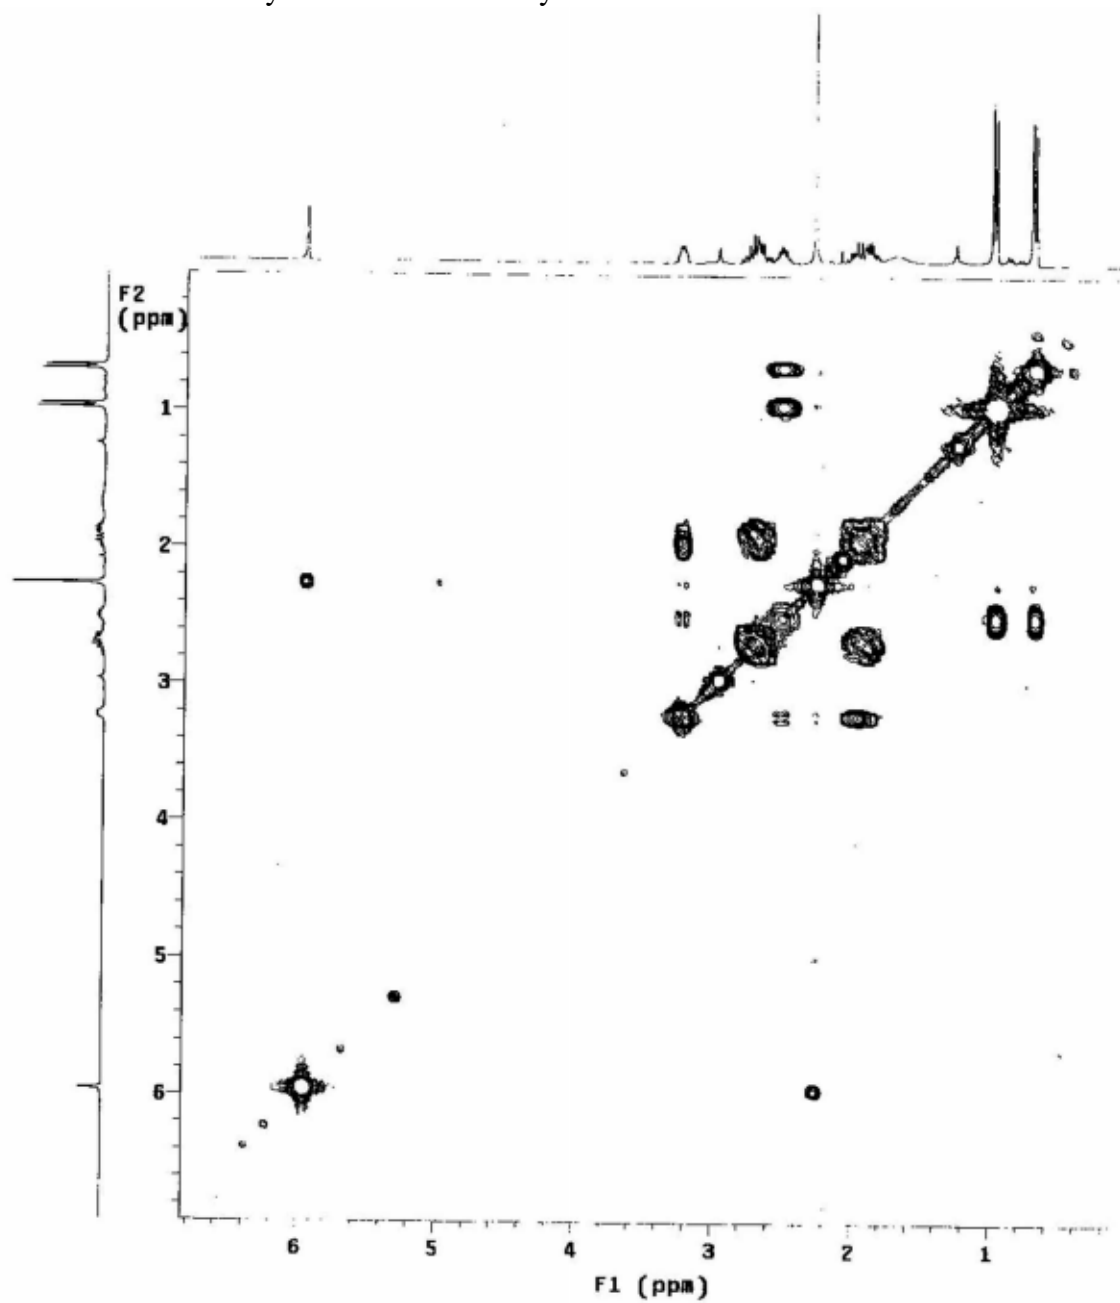



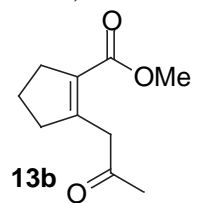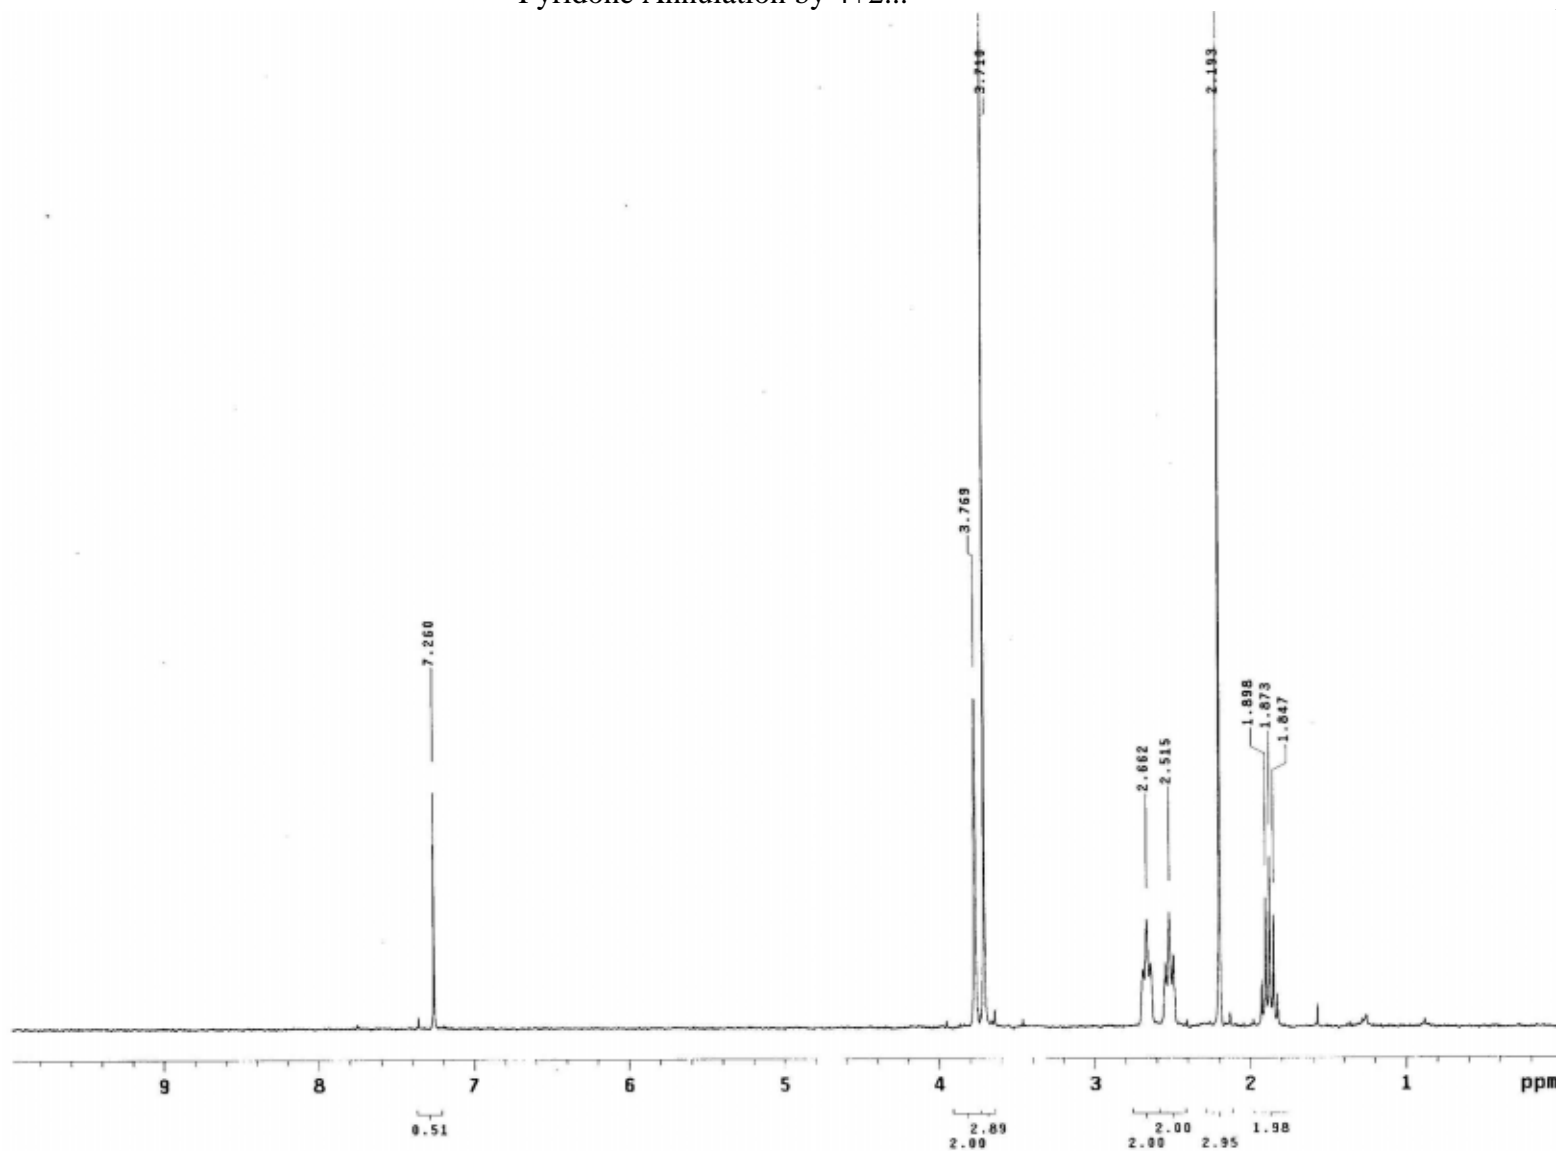

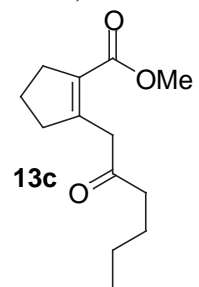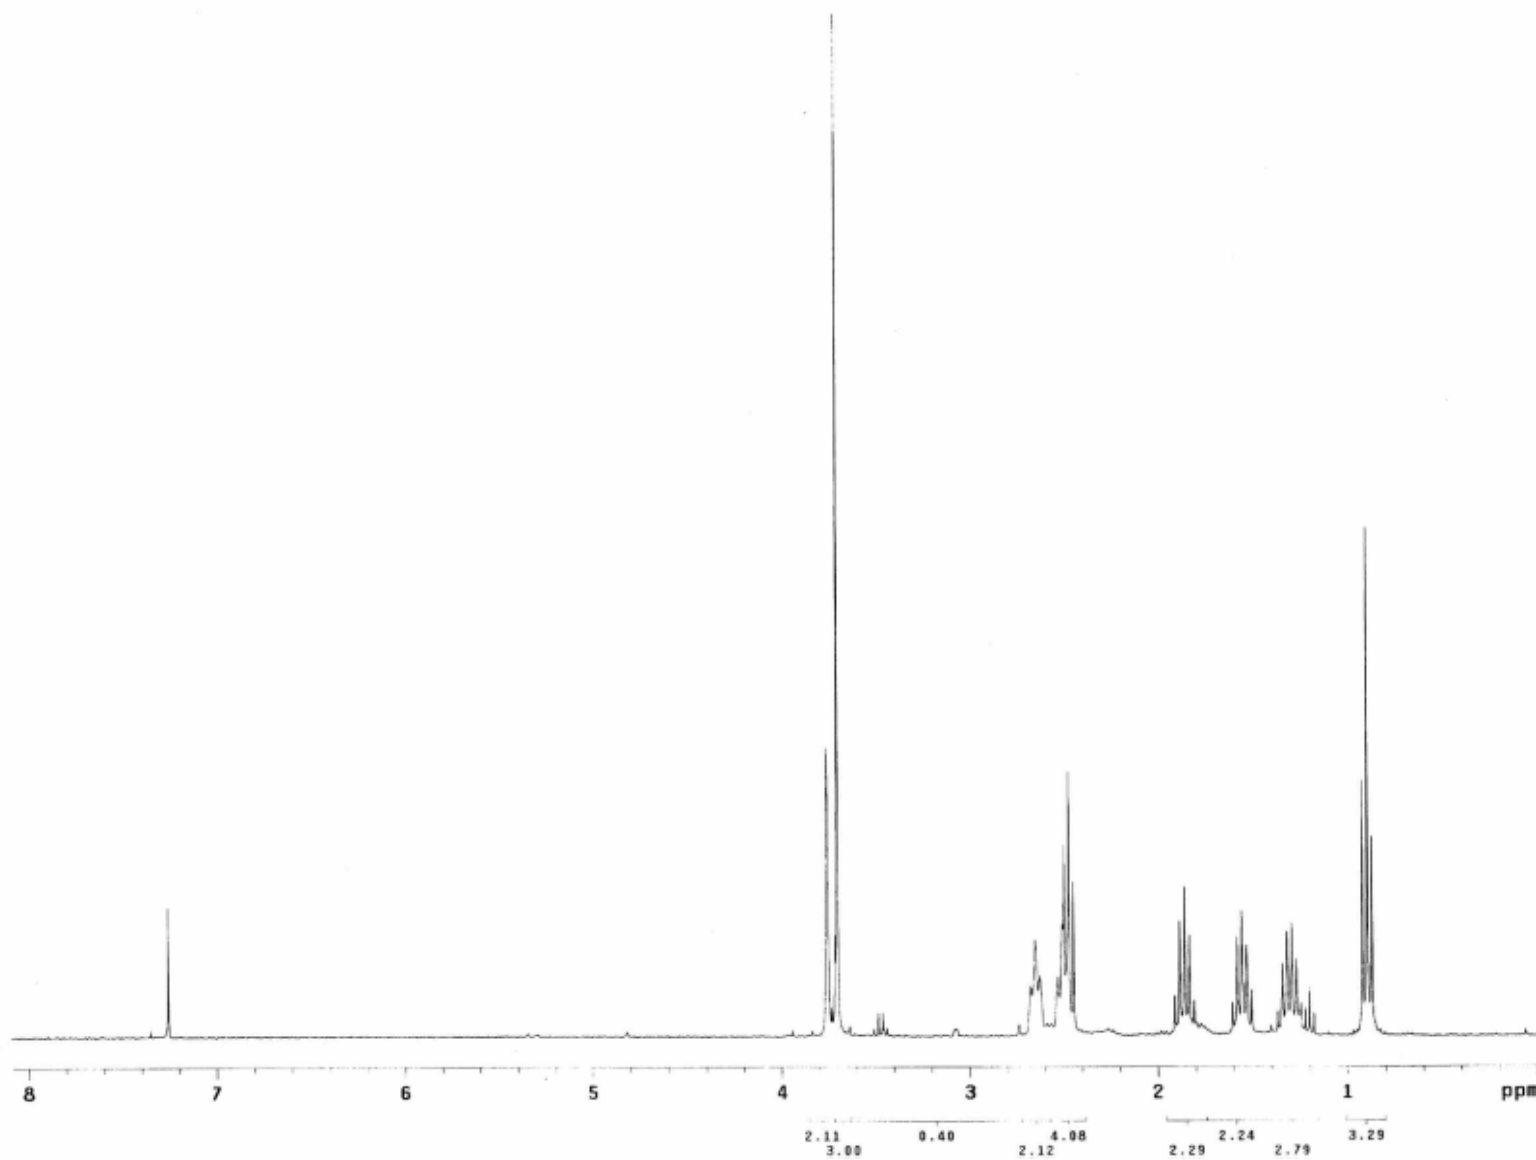

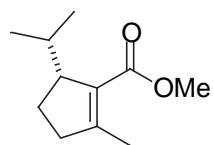**14**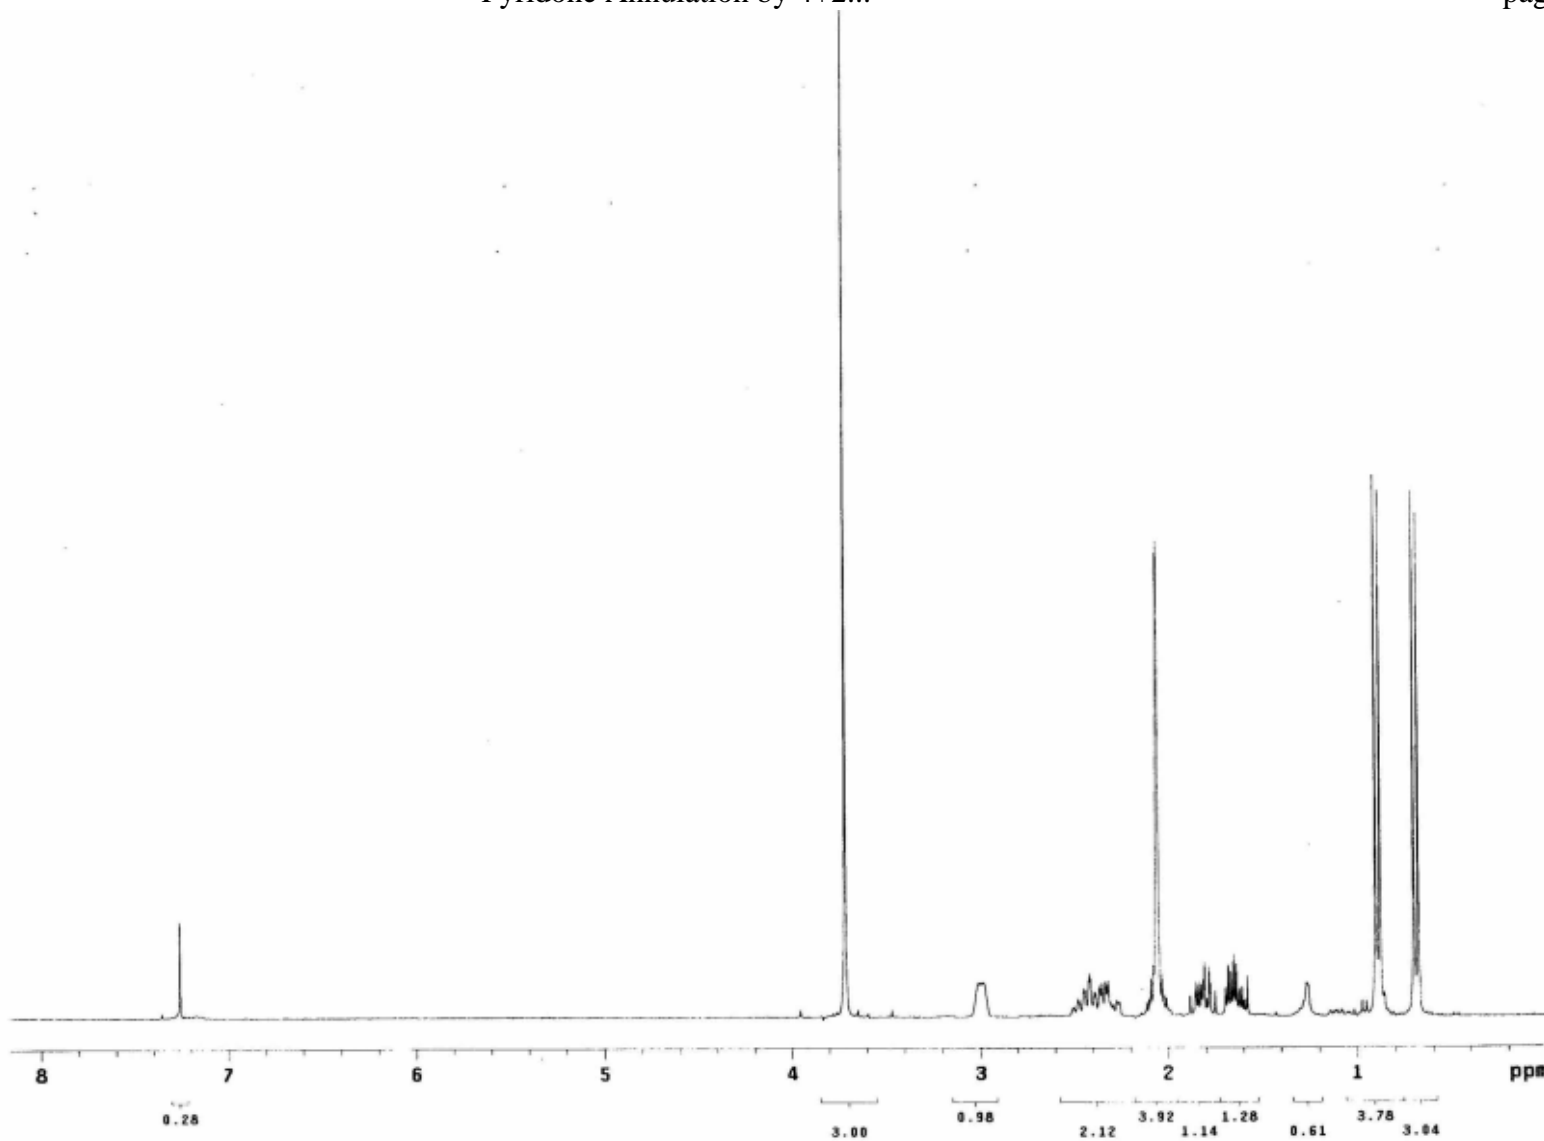

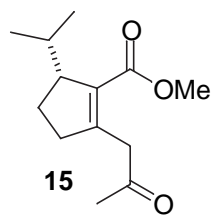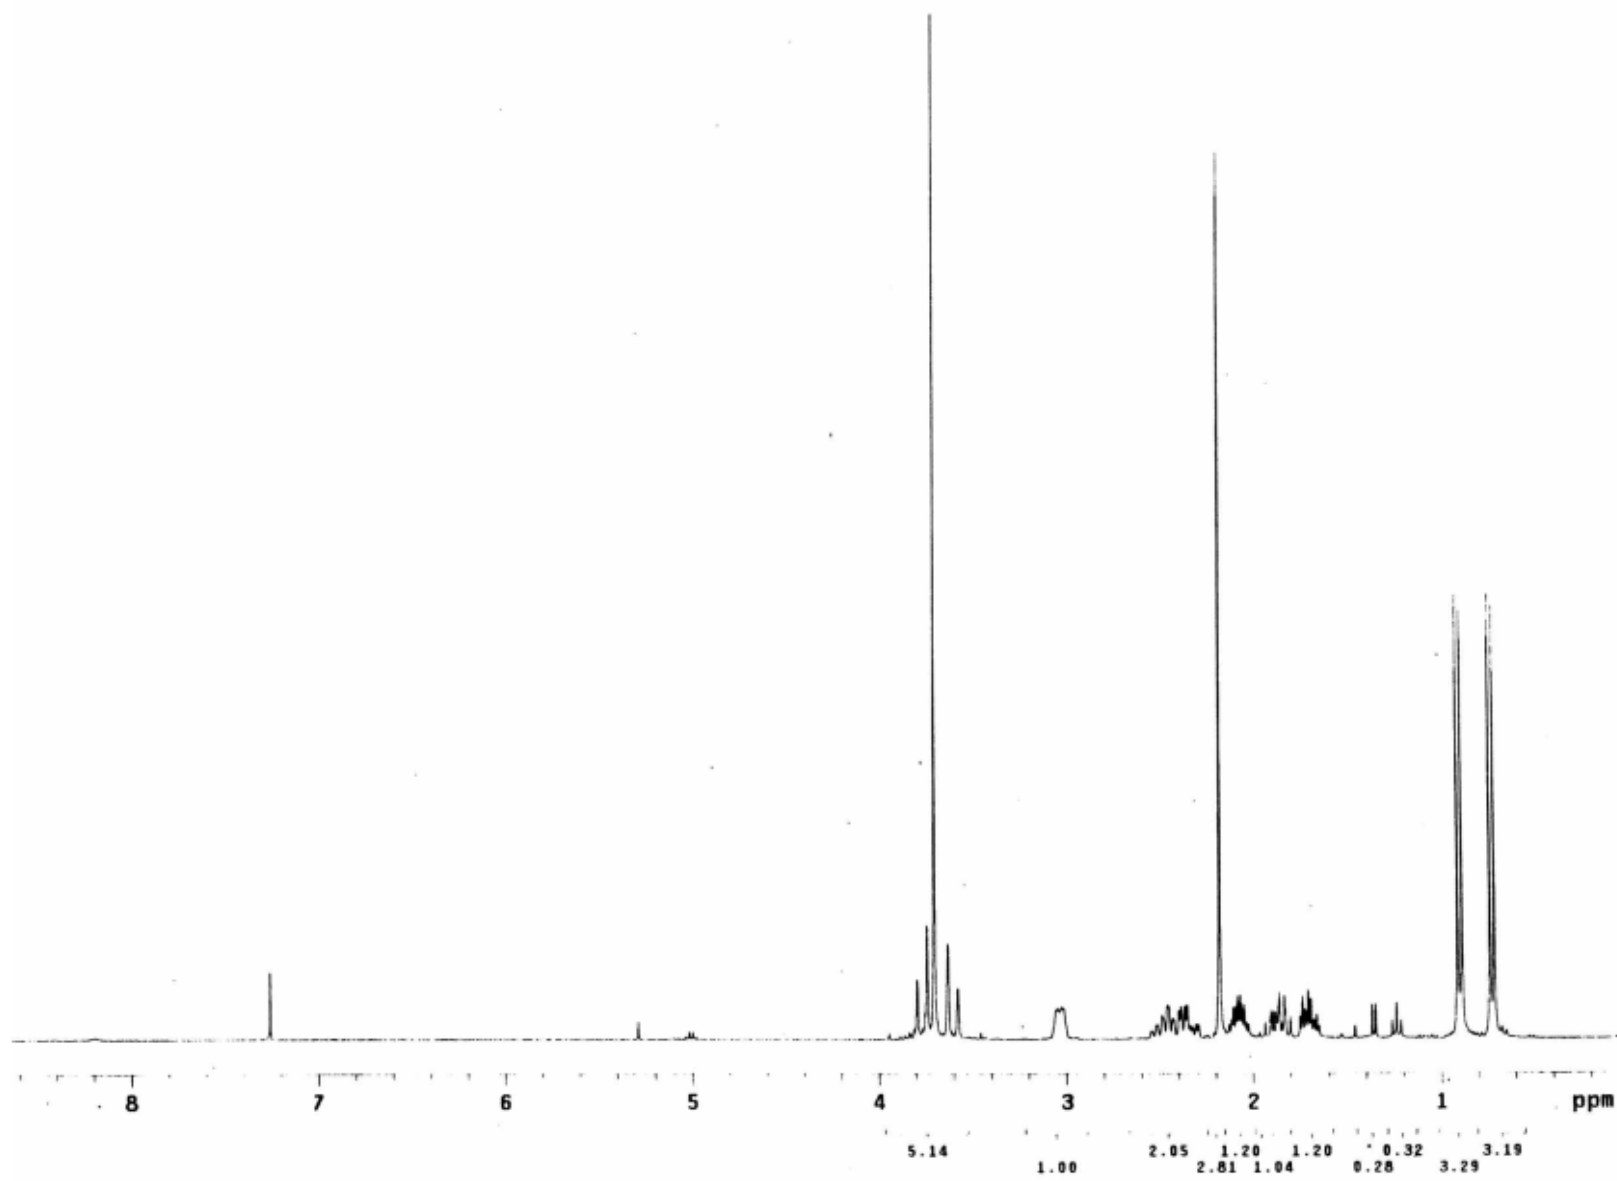

Supplement: Supplementary file 1 [file 5781975]
